# Supplementary material for: Overcoming MET-mediated resistance in oncogene-driven NSCLC
Source: PubMed Central journal article supplement — iScience. 2023 May 29;26(7):107006. doi: 10.1016/j.isci.2023.107006 (PMC10391663; doi:10.1016/j.isci.2023.107006), 2023-05-29
Supplement: mmc1.pdf [file mmc1.pdf]

iScience, Volume 26

## **Supplemental information**

### **Overcoming MET-mediated resistance in oncogene-driven NSCLC**

**Nadine Reischmann, Carolin Schmelas, Miguel Ángel Molina-Vila, Núria Jordana-Ariza, Daniel Kuntze, Silvia García-Roman, Manon A. Simard, Doreen Musch, Christina Esdar, Joachim Albers, and Niki Karachaliou**

**A**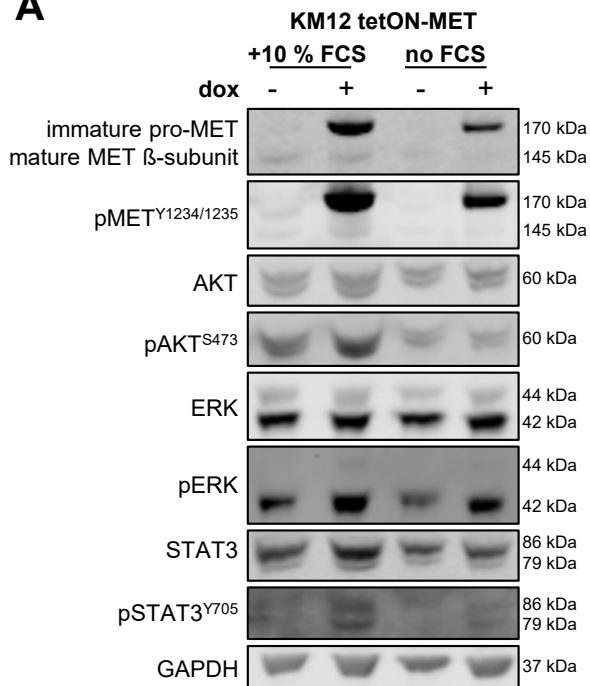**B**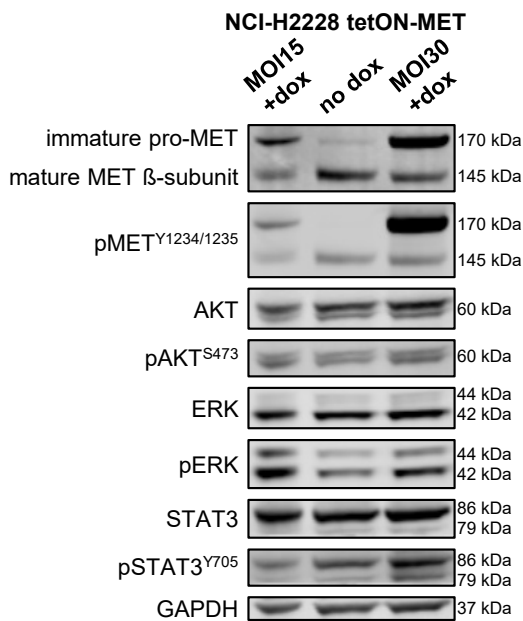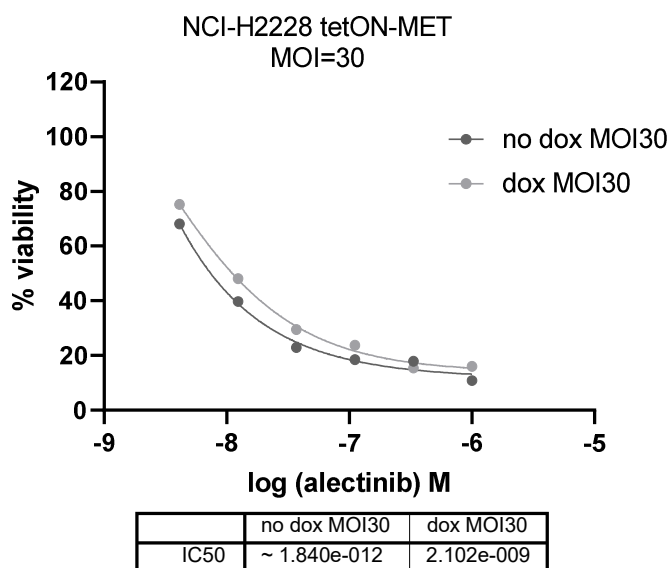

**Supplementary Figure S1: Further investigation of KM12 tetON-MET and NCI-H2228 tetON-MET cells, related to Figure 2.**

**A**, KM12 tetON-MET cells were treated with/ without doxycycline and with/ without 10% FCS for 48 hours, before lysis, and Western blot analysis was performed with the indicated antibodies.

**B**, Western blot analysis of NCI-H2228 tetON-MET cells transduced with multiplicity of infection (MOI) = 15 compared to MOI = 30 and cell viability analysis of NCI-H2228 tetON-MET cells transduced with MOI = 30.

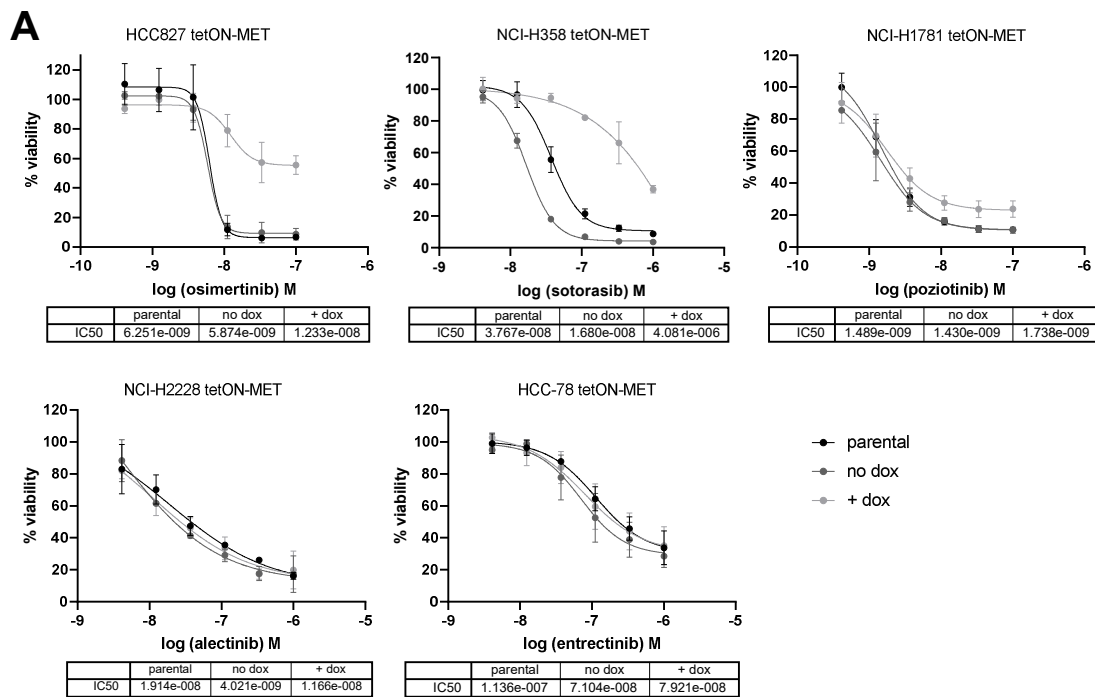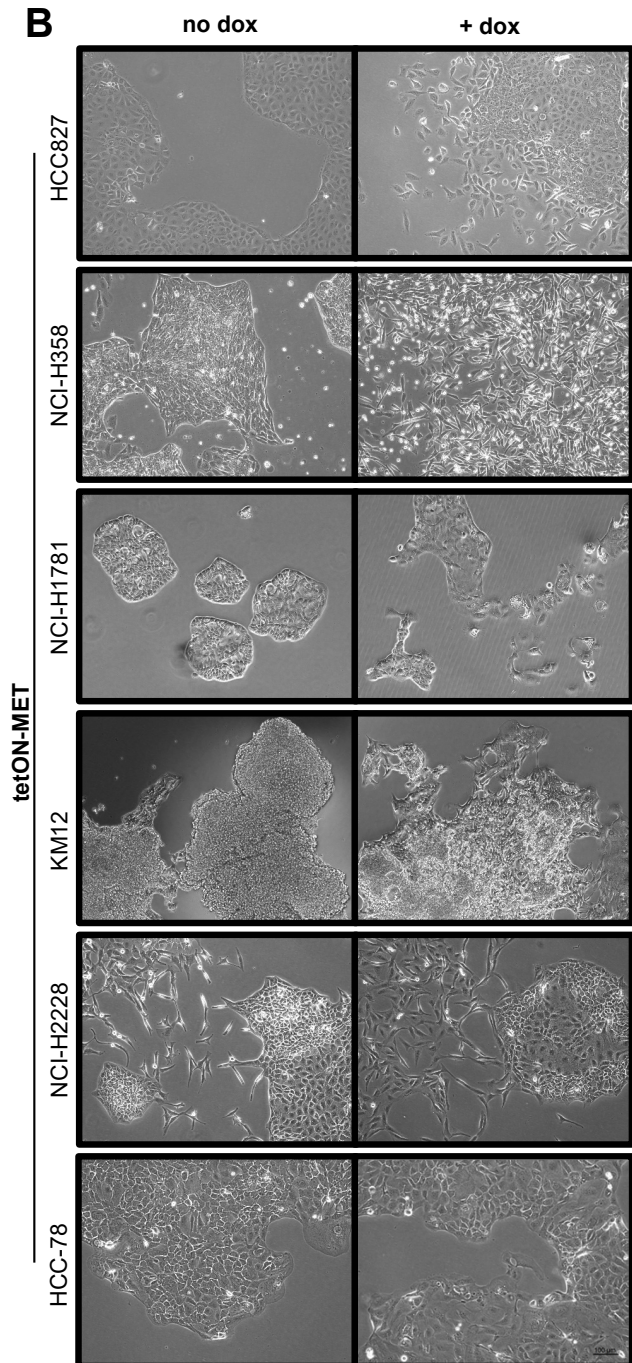

**Supplementary Figure S2: Further investigation of the tetON MET cell lines, related to Figure 2.**

**A**, The indicated cells were cultured with doxycycline for 24 hours before they were treated with the respective targeted therapies. Cellular viability was measured six days from treatment onset. Data are represented as mean  $\pm$  SD ( $n = 3$ ).

**B**, Brightfield microscopy images of the tetON-MET cells used in this study after 14 days of doxycycline treatment.

HCC827 tetON-MET (EGFR<sup>ex19del</sup>)

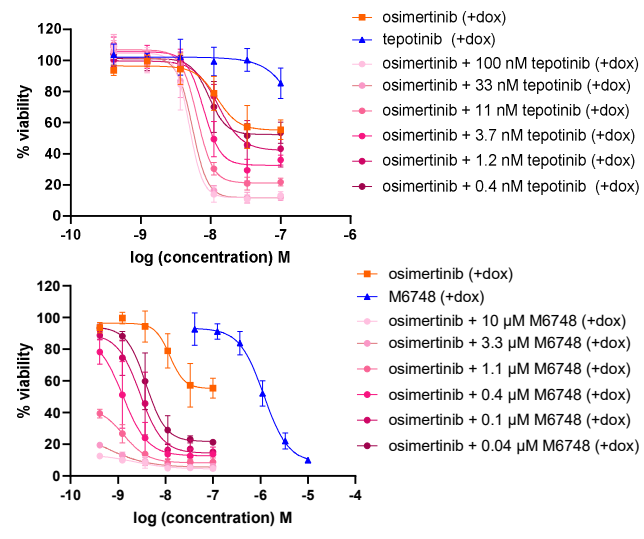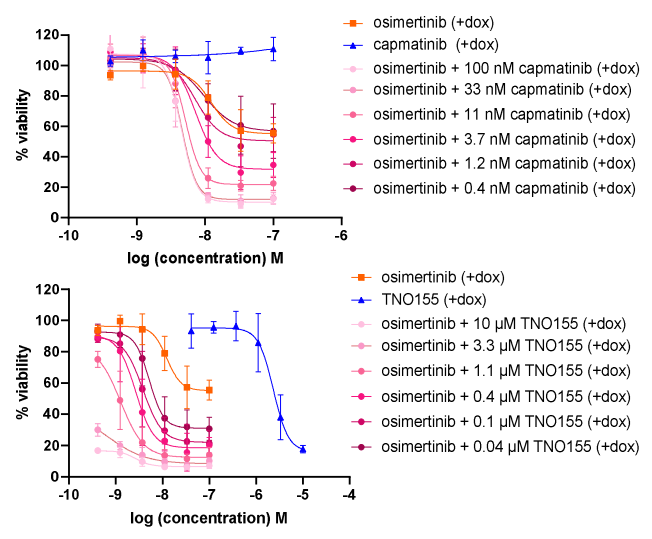

NCI-H358 tetON-MET (KRAS<sup>G12C</sup>)

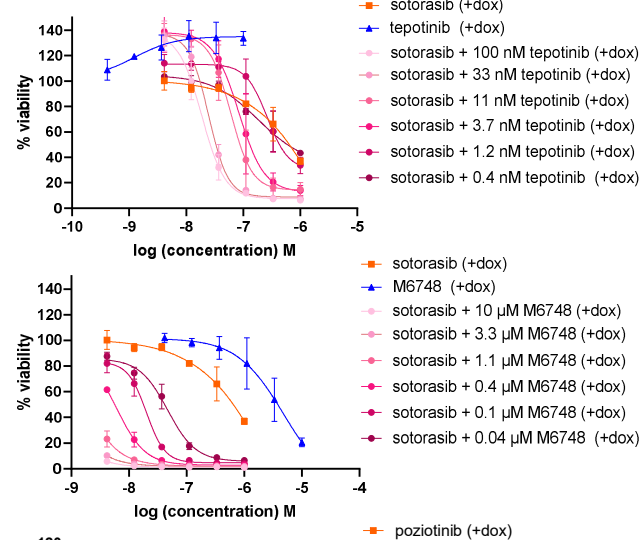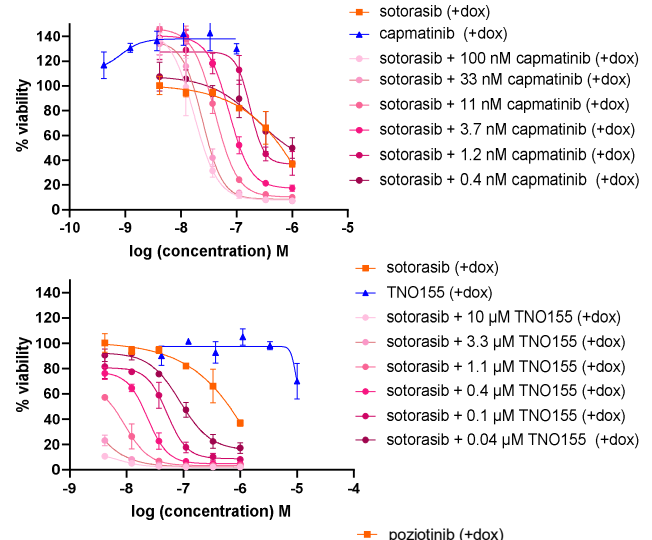

NCI-H1781 tetON-MET (HER2<sup>ex20ins</sup>)

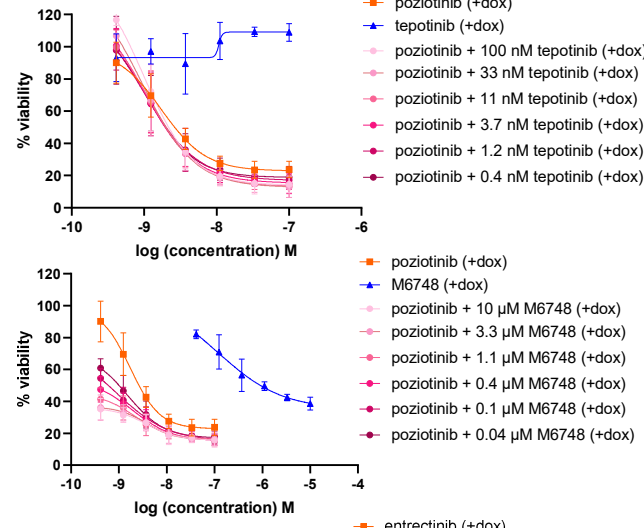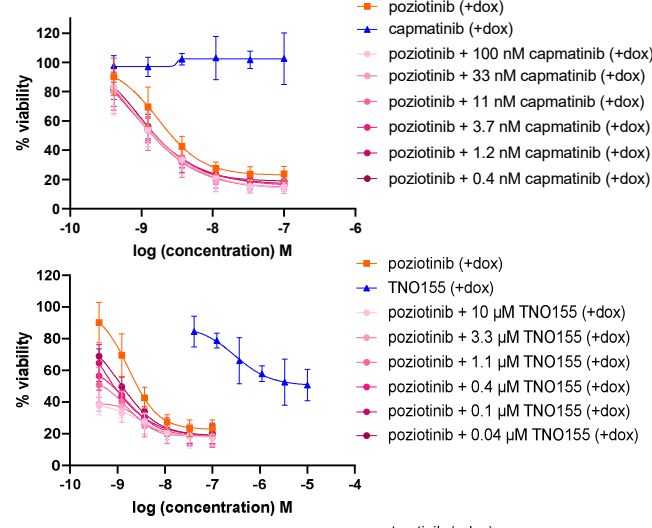

KM12 tetON-MET (TPM3-NTRK1)

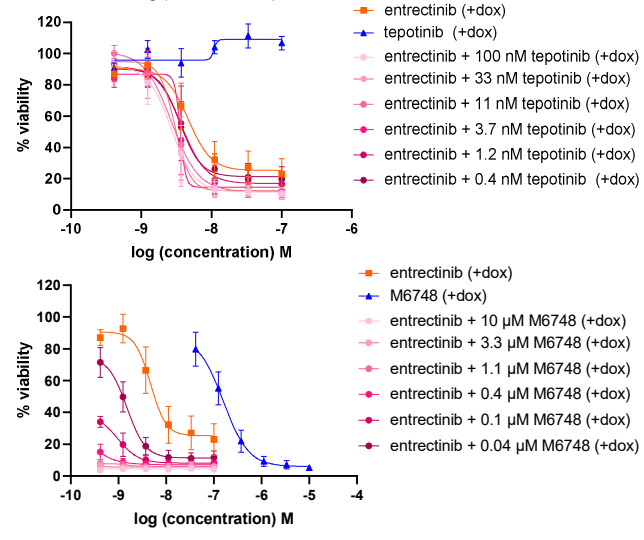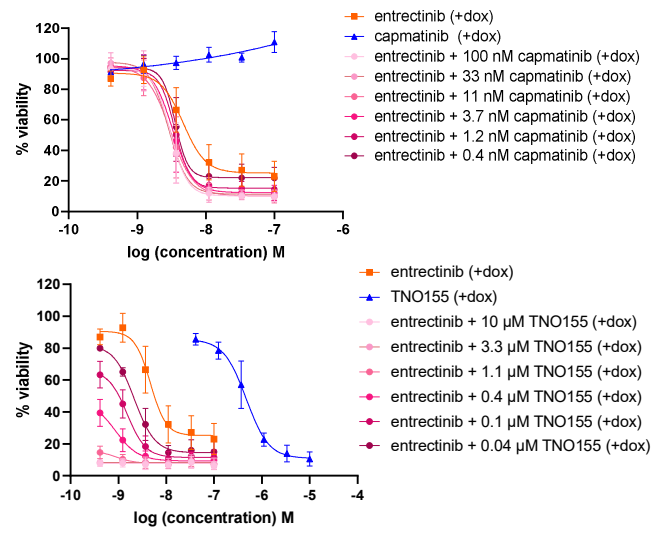

**Supplementary Figure S3: Cell viability analyses of tetON-MET cells upon combination treatments, related to Figure 4.**

The antiproliferative effects of the targeted therapies combined with tepotinib/ capmatinib or M6748/ TNO155 were assessed in the respective tetON-MET cell lines using combination dose matrices in 6-day viability assays. Graphs visualizing the mean  $\pm$  SD (n = 3) are shown.

### HCC827 tetON-MET (*EGFR<sup>ex19del</sup>*)

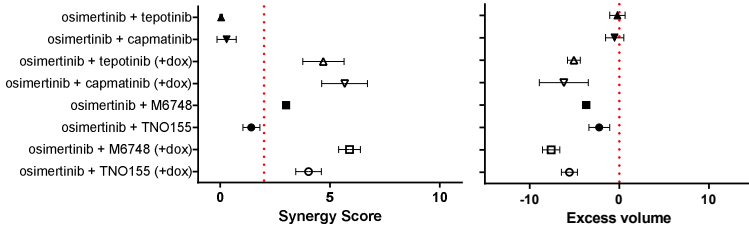

### NCI-H358 tetON-MET (*KRAS<sup>G12C</sup>*)

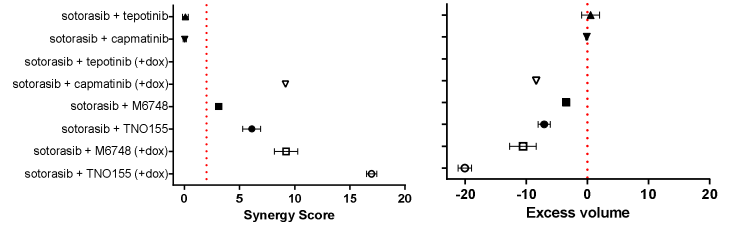

### NCI-H1781 tetON-MET (*HER2<sup>ex20ins</sup>*)

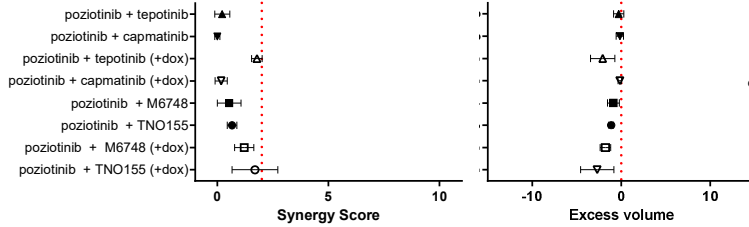

### KM12 tetON-MET (*TPM3-NTRK1*)

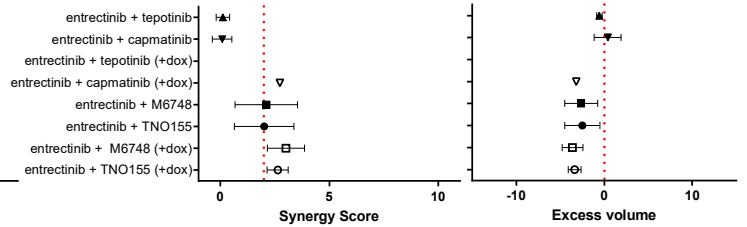

## Supplementary Figure S4: Synergy analyses of targeted therapies and MET or SHP2 inhibitors in tetON-MET cells, related to Figure 4.

The antiproliferative effects of the targeted therapies combined with tepotinib/ capmatinib or M6748/ TNO155 were assessed in the respective tetON-MET cell lines by combination dose matrices in 6-day viability assays. The mean Synergy Scores and excess volumes of three independent experiments are shown. Synergism: Synergy Score > 2, Excess volume < 0.

**A**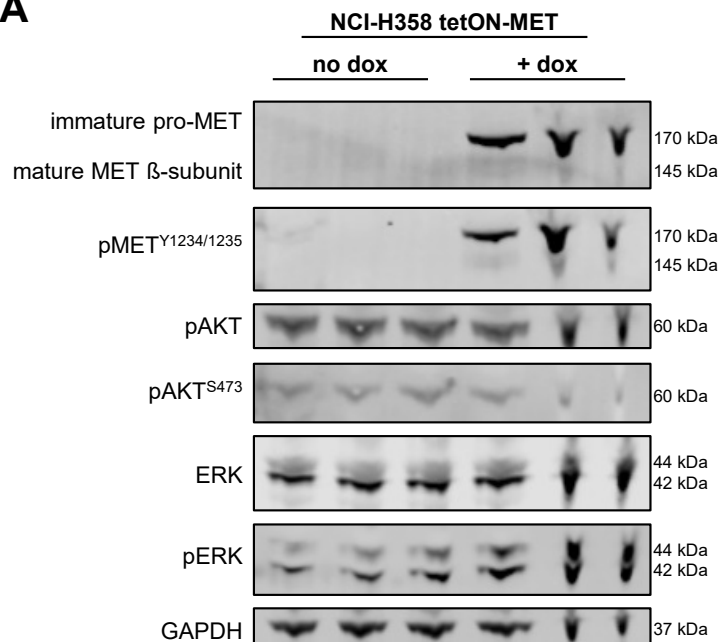**B**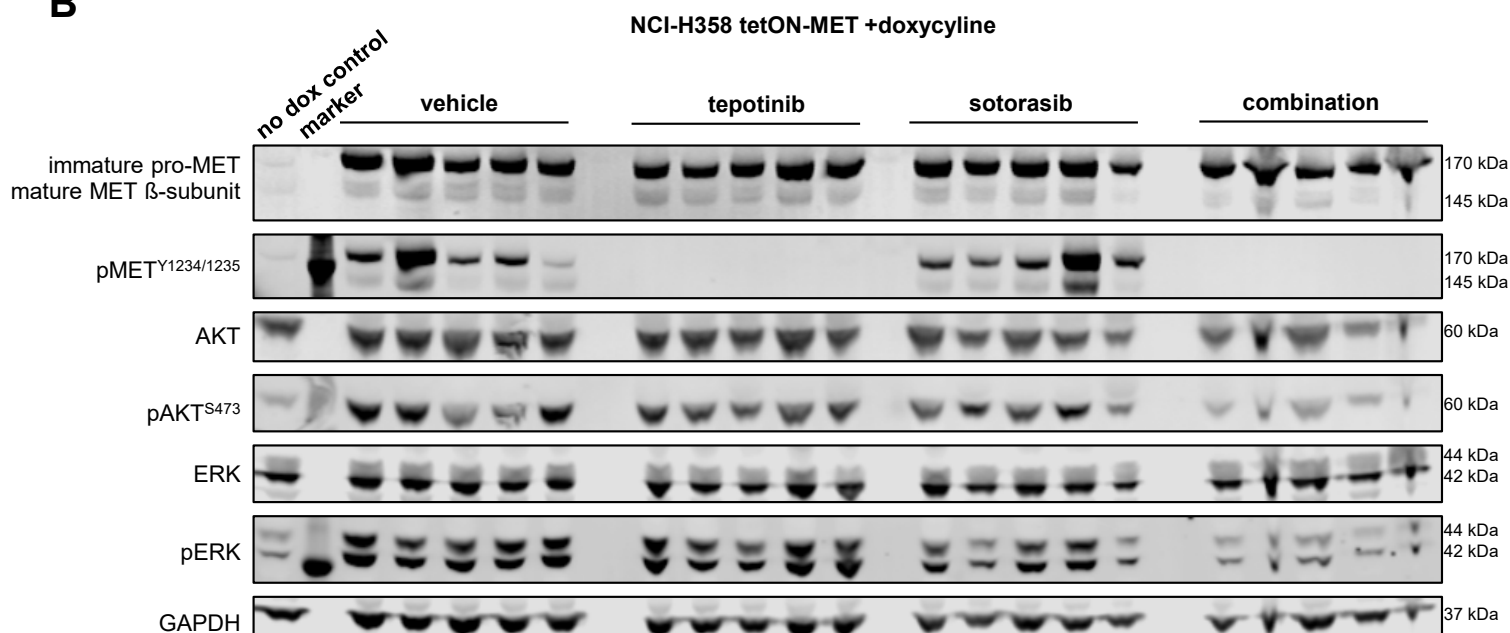

**Supplementary Figure S5, Western blot analyses of NCI-H358 tetON-MET xenograft tumors, related to Figure 5.**

**A**, Overexpression of MET in NCI-H358 tetON-MET tumor lysates of mice fed with a doxycycline-containing diet.

**B**, Tumor lysates of mice with NCI-H358 tetON-MET tumors fed with a doxycycline-containing diet and treated with tepotinib, sotorasib or the combination of both were analyzed by Western blot after treatment termination.

**Supplementary Table S1: Table listing all liquid (blood, cerebrospinal fluid, pleural effusion) biopsies (LBx) and tumor or cytological biopsies (TBx) collected from 28 patients with NSCLC who had disease progression on ALK (n=15), ROS1 (n=8) or RET (n=5) TKIs, related to Figure 1.**

Unless otherwise indicated, the TKI was the 1<sup>st</sup> line treatment.

Patients were considered *METamp* positive by FISH if they showed: (i) a *MET/CEP7* ratio (r)  $\geq 2$  and (ii) *MET* gene copy number (GCN) per cell  $\geq 6$ . Patients were considered MET/pMET immunohistochemistry (IHC) positive if intense membrane staining (3+) was observed in  $\geq 50\%$  of the tumor cells.

|          | Patient No.                  | Sex<br>Age <sup>1</sup><br>Stage <sup>1</sup> | Type of rearrangement        | Type of biopsy   | Date of biopsy | Progression on                                 | PFS (months)          | NGS <sup>2</sup> | nCounter fusions             | nCounter <i>MET</i> mRNA <sup>3</sup> | <i>MET</i> r & GCN by FISH <sup>3</sup> | MET IHC <sup>3</sup> | pMET IHC <sup>3</sup> |
|----------|------------------------------|-----------------------------------------------|------------------------------|------------------|----------------|------------------------------------------------|-----------------------|------------------|------------------------------|---------------------------------------|-----------------------------------------|----------------------|-----------------------|
| LBx only | P1                           | unknown<br>unknown<br>unknown                 | <i>KIF5B-RET</i> (ex15-ex12) | blood            | 13/09/2019     | alectinib                                      | 10                    | ND               | <i>KIF5B-RET</i> (ex15-ex12) |                                       |                                         |                      |                       |
|          | P2                           | Female<br>unknown<br>unknown                  | <i>CCDC6-RET</i> (ex1-ex12)  | blood            | 18/02/2020     | alectinib                                      | 2                     | ND               | ND                           |                                       |                                         |                      |                       |
|          | P3                           | unknown<br>unknown<br>unknown                 | <i>KIF5B-RET</i> (ex15-ex12) | blood            | 21/02/2020     | alectinib                                      | 3                     | ND               | <i>KIF5B-RET</i> (ex15-ex12) |                                       |                                         |                      |                       |
|          | P4                           | Female<br>67<br>IV                            | <i>ALK</i> , variant unknown | blood            | 04/03/2020     | ceritinib/ brigatinib                          | unknown               | ND               | NA                           |                                       |                                         |                      |                       |
|          | P5                           | Female<br>65<br>IV                            | <i>ALKv3</i>                 | blood            | 08/05/2020     | alectinib                                      | 5                     | ND               | ND                           |                                       |                                         |                      |                       |
|          | P6                           | Female<br>58<br>II                            | <i>ALKv3</i>                 | blood            | 30/09/2020     | alectinib                                      | 19                    | ND               | ND                           |                                       |                                         |                      |                       |
|          |                              |                                               |                              | blood            | 28/01/2021     | lorlatinib (2 <sup>nd</sup> line)              | 4                     | ND               | NA                           |                                       |                                         |                      |                       |
|          |                              |                                               |                              | blood            | 05/10/2021     | pemetrexed + lorlatinib (3 <sup>rd</sup> line) | 9                     | <i>METamp</i>    | ND                           |                                       |                                         |                      |                       |
|          | P7                           | unknown<br>unknown<br>unknown                 | <i>KIF5B-RET</i> (ex15-ex12) | blood            | 02/12/2020     | alectinib                                      | 17                    | ND               | ND                           |                                       |                                         |                      |                       |
|          | P8                           | Female<br>59<br>unknown                       | <i>ALKv3a</i> (E6a/A20)      | pleural effusion | 13/08/2021     | alectinib                                      | 11                    | ND               | <i>ALKv3</i>                 |                                       |                                         |                      |                       |
| blood    |                              |                                               |                              | 26/10/2021       | alectinib      | 11                                             | <i>ALK</i> : p.I1171N | ND               |                              |                                       |                                         |                      |                       |
| P9       | Female<br>59<br>unknown      | <i>RET</i>                                    | blood                        | 06/10/2021       | selpercatinib  | 17                                             | ND                    | ND               |                              |                                       |                                         |                      |                       |
| P10      | Female<br>unknown<br>unknown | <i>ALKv1</i>                                  | blood                        | 20/10/2020       | lorlatinib     | 48                                             | ND                    | <i>ALKv1</i>     |                              |                                       |                                         |                      |                       |



|             |     |                        |                               |        |            |            |         |                      |                     |    |                      |              |         |
|-------------|-----|------------------------|-------------------------------|--------|------------|------------|---------|----------------------|---------------------|----|----------------------|--------------|---------|
| LBx only    | P11 | Male unknown unknown   | <i>PRKAR1A-ALK</i>            | blood  | 29/11/2021 | alectinib  | unknown | <i>ALK: p.L1196M</i> | ND                  |    |                      |              |         |
|             | P12 | Female unknown unknown | <i>ROS1</i> , variant unknown | blood  | 01/12/2021 | crizotinib | 36      | ND                   | NA                  |    |                      |              |         |
|             | P13 | Female unknown IV      | <i>SLC34A2-ROS1</i>           | blood  | 03/12/2021 | ceritinib  | 3       | ND                   | <i>SCL34A2-ROS1</i> |    |                      |              |         |
|             | P14 | Male 47 unknown        | <i>ALK</i> , variant unknown  | blood  | 20/12/2021 | alectinib  | unknown | ND                   | ND                  |    |                      |              |         |
|             | P15 | Female unknown unknown | <i>CD74-ROS1</i>              | blood  | 19/01/2022 | crizotinib | unknown | ND                   | ND                  |    |                      |              |         |
|             | P16 | Male 62 unknown        | <i>ALK</i> , variant unknown  | blood  | 24/01/2022 | crizotinib | unknown | ND                   | ND                  |    |                      |              |         |
|             | P17 | Female 36 unknown      | <i>CD74-ROS1</i>              | blood  | 28/01/2022 | lorlatinib | unknown | ND                   | <i>CD74-ROS1</i>    |    |                      |              |         |
|             | P18 | Male 71 IV             | <i>ROS1</i> , variant unknown | blood  | 31/01/2022 | lorlatinib | 4       | ND                   | ND                  |    |                      |              |         |
|             | P19 | Male 45 IV             | <i>ALK</i> , variant unknown  | blood  | 19/04/2022 | alectinib  | unknown | ND                   | ND                  |    |                      |              |         |
|             | P20 | Female unknown IV      | <i>ALK</i> , variant unknown  | blood  | 06/05/2022 | lorlatinib | 64      | ND                   | ND                  |    |                      |              |         |
| TBx only    | P21 | Male 56 IV             | <i>CD74-ROS1</i>              | tissue | 12/04/2022 | crizotinib | 35      | *                    | *                   | *  | *                    | NEG (0)      | *       |
| LBx and TBx | P22 | Male unknown IV        | <i>ALKv1</i>                  | blood  | 16/03/2018 | alectinib  | 10      | ND                   | ND                  |    |                      |              |         |
|             |     |                        |                               | tissue | 07/05/2018 | alectinib  | 12      | ND                   | <i>ALKv1</i>        | 7  | NEG (r=0.3; GCN=2.2) | NEG (80% 2+) | NEG (0) |
|             | P23 | Male unknown unknown   | <i>ALKv5</i>                  | blood  | 18/07/2018 | alectinib  | 9       | <i>ALK: p.G1269A</i> | <i>ALKv5</i>        |    |                      |              |         |
|             |     |                        |                               | tissue | 06/08/2018 | alectinib  | 10      | <i>ALK: p.G1269A</i> | <i>ALKv5</i>        | 35 | NEG (r=1.3, GCN=4.1) | NEG (60% 2+) | NEG (0) |

|             |     |                              |           |                        |            |                                   |    |                |           |     |                            |                 |                      |
|-------------|-----|------------------------------|-----------|------------------------|------------|-----------------------------------|----|----------------|-----------|-----|----------------------------|-----------------|----------------------|
| LBx and TBx | P24 | Male<br>56<br>IV             | ALKv1     | blood                  | 15/02/2019 | lorlatinib                        | 2  | ND             | NA        |     |                            |                 |                      |
|             |     |                              |           | tissue                 | 25/02/2019 | lorlatinib                        | 2  | METamp         | ALKv1     | 105 | POS<br>(r>5,<br>GCN>15)    | POS<br>(95% 3+) | POS<br>(100% 3+)     |
|             | P25 | Female<br>48<br>IV           | ALKv5     | tissue                 | 10/03/2019 | alectinib                         | 23 | ALK: p.G1202R  | ALKv5     | 31  | NEG<br>(r=1.0;<br>GCN=2.8) | NEG<br>(60% 2+) | NEG<br>(5% 3+)       |
|             |     |                              |           | blood                  | 16/08/2019 | lorlatinib (2 <sup>nd</sup> line) | 5  | ND             | NA        |     |                            |                 |                      |
|             |     |                              |           | cerebrospinal<br>fluid | 16/08/2019 | lorlatinib (2 <sup>nd</sup> line) | 5  | ND             | NA        |     |                            |                 |                      |
|             | P26 | Female<br>64<br>IV           | CD74-ROS1 | blood                  | 15/06/2020 | crizotinib                        | 6  | ND             | ND        |     |                            |                 |                      |
|             |     |                              |           | tissue                 | 28/10/2020 | crizotinib                        | 10 | ND             | CD74-ROS1 | 99  | NEG<br>(r=1.2;<br>GCN=2.8) | POS<br>(80% 3+) | NEG (0) <sup>4</sup> |
|             | P27 | Male<br>57<br>IV             | ALKv1     | blood                  | 08/10/2020 | brigatinib                        | 2  | ND             | NA        |     |                            |                 |                      |
|             |     |                              |           | cerebrospinal<br>fluid | 08/10/2020 | brigatinib                        | 2  | ND             | ALKv1     |     |                            |                 |                      |
|             |     |                              |           | cerebrospinal<br>fluid | 26/02/2021 | lorlatinib (2 <sup>nd</sup> line) | 4  | ND             | ALKv1     |     |                            |                 |                      |
|             |     |                              |           | pleural effusion       | 29/04/2021 | lorlatinib (2 <sup>nd</sup> line) | 6  | METamp         | NA        |     |                            |                 |                      |
|             |     |                              |           | cytological            | 29/04/2021 | lorlatinib (2 <sup>nd</sup> line) | 6  | METamp         | ALKv1     |     |                            |                 |                      |
|             | P28 | Female<br>unknown<br>unknown | CD74-ROS1 | pleural effusion       | 08/10/2021 | lorlatinib                        | 9  | ROS1: p.G2026R | ND        |     |                            |                 |                      |
|             |     |                              |           | cytological            | 08/10/2021 | lorlatinib                        | 9  | ROS1: p.G2026R | CD74-ROS1 |     |                            |                 |                      |

<sup>1</sup> Age and stage are reported at the time of diagnosis.

<sup>2</sup> NGS analysis covers mutations and copy number variations (CNVs) in 30 genes frequently altered in lung cancer (*EGFR, BRAF, MET, ERBB2, ALK, ROS1, RET, PIK3CA, KRAS, NRAS, KIT, PDGFRA, TP53, STK11, KEAP1, ARID1A, FAT1, NFE2L2, SETD2, POLE, POLD1, IDH1, IDH2, ERBB4, FGFR1, FGFR2, FGFR3, MYC, CDK4, CDK6*). ND means that no mutations or CNVs in the 30 genes were detected.

<sup>3</sup> nCounter *MET* mRNA, *MET* r & GCN by FISH, *MET* IHC and pMET IHC were only analyzed in tissue samples.

<sup>4</sup> The negative pMET result of the tissue biopsy of P26 might be an artifact due to inaccurate tissue fixation. A primary cell culture established from P26 at progression showed positive pMET IHC.

\* Insufficient material

ND: Not detected

NA: Not analyzed

**Supplementary Table S2: Table listing the probe set for nCounter hybridization, related to Figure 1 and Supplementary Table S1.**

| Assay Type | Target Variant                     | Accession Number | Target Sequence                                                                                          |
|------------|------------------------------------|------------------|----------------------------------------------------------------------------------------------------------|
| Fusion     | <i>EML4-ALK_E13:A20</i>            | PFUS_001.1:1     | ATATGGAGCAAACTACTGTAGAGCCCACACCTGGGAAAGGACCTAAAGTGTAC<br>CGCCGGAAGCACCAGGAGCTGCAAGCCATGCAGATGGAGCTGCAG   |
| Fusion     | <i>EML4-ALK_E20:A20</i>            | PFUS_002.1:1     | GACAACAAGTATATAATGTCTAACTCGGGAGACTATGAAATATTGTACTTGTACCG<br>CCGGAAGCACCAGGAGCTGCAAGCCATGCAGATGGAGCTGCAG  |
| Fusion     | <i>EML4-ALK_E6:A20</i>             | PFUS_003.1:1     | AAAGTTACCAAACTGCAGACAAGCATAAAGATGTCATCATCAACCAAGTGTACC<br>GCCGGAAGCACCAGGAGCTGCAAGCCATGCAGATGGAGCTGCAG   |
| Fusion     | <i>EML4-ALK_E2:A20</i>             | PFUS_006.1:1     | ATCTCTGAAGATCATGTGGCCTCAGTGAAAAATCAGTCTCAAGTAAAGTGTACC<br>GCCGGAAGCACCAGGAGCTGCAAGCCATGCAGATGGAGCTGCAG   |
| Fusion     | <i>EML4-ALK_E18:A20</i>            | PFUS_008.1:1     | ATCCACACAGACGGGAATGAACAGCTCTCTGTGATGCGCTACTCAATAGTGTACC<br>GCCGGAAGCACCAGGAGCTGCAAGCCATGCAGATGGAGCTGCAG  |
| Fusion     | <i>TFG-ALK_T5:A20</i>              | PFUS_016.1:1     | CAGCAGCCACCATATACAGGAGCTCAGACTCAAGCAGGTCAGATTGAAGTGTAC<br>CGCCGGAAGCACCAGGAGCTGCAAGCCATGCAGATGGAGCTGCAG  |
| Fusion     | <i>KIF5B-ALK_K17:A20</i>           | PFUS_031.1:0     | TTGGAGGAATCTGTGCATGCCCTCAGTGAAGAAGTAGTCCAGCTTCGAGCACAA<br>GTGTACCGCCGGAAGCACCAGGAGCTGCAAGCCATGCAGATGGAGC |
| Fusion     | <i>EZR-ROS1_E10:R34</i>            | PFUS_032.1:2     | AAGGAGGAGTTGATGCTGCGGCTGCAGGACTATGAGGAGAAGACAAAAGAGGC<br>AGAGAGAGATGATTTTTGGATAACCAGAAAAGTTTCATACTTACTA  |
| Fusion     | <i>GOPC-ROS1_G4:R36</i>            | PFUS_023.1:0     | CCCTGGTGCTAGTTGCAAAGACACAAGTGGGGAAATCAAAGTATTACAAGTCTG<br>GCATAGAAGATTAAGAATCAAAAAGTGCCAAGGAAGGGGTGACA   |
| Fusion     | <i>TPM3-ROS1_T8:R35</i>            | PFUS_035.1:21    | AGTTTGCTGAGAGATCGGTAGCCAAGCTGGAAAAGACAATTGATGACCTGGAAG<br>TCTGGCATAGAAGATTAAGAATCAAAAAGTGCCAAGGAAGGGGT   |
| Fusion     | <i>LRIG3-ROS1_L16:R35</i>          | PFUS_027.1:32    | AGTTTGTCACATCTTCAGGTGCTGGATTTTTCTTACCACAACATGACAGTAGTGTG<br>TGCCATAGAAGATTAAGAATCAAAAAGTGCCAAGGAAGGGGT   |
| Fusion     | <i>GOPC-ROS1_G7:R35</i>            | PFUS_022.1:0     | TATGGGGCGAGACTAGCTGCCAAGTACTTGGATAAGGAACTGGCAGGAAGTACT<br>CTTCCAACCAAGAGGAGATTGAAAATCTTCTGCCTTCCCTCGGG   |
| Fusion     | <i>SLC34A2-ROS1_S13del2046:R32</i> | PFUS_034.1:23    | AAGGCTCCTGAGACCTTTGATAACATAACCATTAGCAGAGAGGCTCAGGCTGGA<br>GTCCCAAATAAACCAGGCATTCCCAAATTACTAGAAGGGAGTAAA  |

|                                   |                               |                        |                                                                                                           |
|-----------------------------------|-------------------------------|------------------------|-----------------------------------------------------------------------------------------------------------|
| Fusion                            | <i>CD74-ROS1_C6:R32</i>       | PFUS_030.1:23          | AATGAGCAGGCACTCCTTGGAGCAAAGCCCACTGACGCTCCACCGAAAGCTGG<br>AGTCCCAAATAAACCCAGGCATTCCCAAATTAAGGAGTAA         |
| Fusion                            | <i>SDC4-ROS1_S2:R32</i>       | PFUS_024.1:35          | GCCCGGGCAGGAATCTGATGACTTTGAGCTGTCTGGCTCTGGAGATCTGGCTGG<br>AGTCCCAAATAAACCCAGGCATTCCCAAATTAAGGAGTAA        |
| Fusion                            | <i>SDC4-ROS1_S4:R34</i>       | PFUS_033.1:7           | GGTGTCAATGTCCAGCACTGTGCAGGGCAGCAACATCTTTGAGAGAACGGAGGT<br>CCTGGCAGATGATTTTTGGATACCAGAAACAAGTTTCATACTACT   |
| Fusion                            | <i>SLC34A2_S4:ROS1-Common</i> | PFUS_020.1:5           | GTGTGCTCCCTGGATATTCTTAGTAGCGCCTTCCAGCTGGTTGGAGCTGGAGTC<br>CCAAATAAACCCAGGCATTCCCAAATTAAGGAGTAA            |
| Fusion                            | <i>KIF5B-RET_K16:R12</i>      | PFUS_025.1:7           | AAGAAAATGAAAAGGAGTTAGCAGCATGTCAGCTTCGTATCTCTCAAGAGGATCC<br>AAAGTGGGAATTCCTCGGAAGAACTTGGTTCTTGGAAAACTCT    |
| Fusion                            | <i>KIF5B-RET_K22:R12</i>      | PFUS_026.1:12          | ACCTGCGCAAACCTCTTTGTTCCAGGACCTGGCTACAAGAGTTAAAAAGGAGGATCC<br>AAAGTGGGAATTCCTCGGAAGAACTTGGTTCTTGGAAAACTCT  |
| Fusion                            | <i>KIF5B-RET_K23:R12</i>      | PFUS_029.1:51          | CCTTTCTTGAAAATAATCTTGAACAGCTCACTAAAGTGCACAAACAGGAGGATCC<br>AAAGTGGGAATTCCTCGGAAGAACTTGGTTCTTGGAAAACTCT    |
| Fusion                            | <i>CCDC6-RET_C1:R12</i>       | PFUS_039.1:10          | GGAGGAGAACC GCGACCTGCGCAAAGCCAGCGTGACCATCGAGGATCCAAAGT<br>GGGAATTCCTCGGAAGAACTTGGTTCTTGGAAAAAC            |
| Fusion                            | <i>KIF5B_K24-Common</i>       | PFUS_013.1:1           | GCAGTCAGGTCAAAGAATATGGCCAGAAGAGGGCATTCTGCACAGATTGTGTAC<br>CGCCGGAAGCACCAGGAGCTGCAAGCCATGCAGATGGAGCTGCAG   |
| Fusion                            | <i>KIF5B_K15-Common</i>       | PFUS_028.1:40          | AAGACCTTGCAGAAATAGGAATTGCTGTGGGAAATAATGATGTAAGGAGGATCC<br>AAAGTGGGAATTCCTCGGAAGAACTTGGTTCTTGGAAAACTCT     |
| <i>MET<math>\Delta</math>ex14</i> | <i>MET</i>                    | RCC_AS01_065.1:27_T053 | TCCTGTGGCTGAAAAAGAGAAAGCAAATTAAGATCAGTTTCCTAATTCATCTCAG<br>AACGGTTCATGCCGACAAGTGCAGTATCCTCTGACAG          |
| <i>MET wt</i>                     | <i>MET</i>                    | RCC_AS01_066.2:1_T052  | CCTGTGGCTGAAAAAGAGAAAGCAAATTAAGATCTGGGCAGTGAATTAGTTTCGC<br>TACGATGCAAGAGTACACACTCCTCATTTGGATAGGC          |
| Endogenous                        | <i>GAPDH</i>                  | NM_002046.3:35_T001    | TCCTCCTGTTTCGACAGTCAGCCGCATCTTCTTTTGCCTCGCCAGCCGAGCCACA<br>TCGCTCAGACACCATGGGGAAGGTGAAGGTCGGAGTCAACGGATTT |
| Endogenous                        | <i>MRPL19</i>                 | NM_014763.3:364_T003   | GGAAGTATTCTTCGTGTTACTACAGCTGACCCATATGCCAGTGGAAAAATCAGCC<br>AGTTTCTGGGGATTTGCATTACAGATCAGGAAGAGGACTTGGAG   |
| Endogenous                        | <i>PSMC4</i>                  | NM_006503.2:250_T004   | TTTCTCCATGCCAGGAGGAGGTGAAGCGAATCCAAAGCATCCCGCTGGTCATC<br>GGACAATTTCTGGAGGCTGTGGATCAGAATACAGCCATCGTGGGCT   |
